# Supplementary material for: Sodium Contents in Dairy Cow Urine and Soil Aggregate Sizes Influence the Amount of Nitrogen Lost from Soil
Source: Hindawi journal article supplement (doi:10.1155/2015/275985), 2015-01-01

1 Supplemental Figure

2 Fig S1. The amount of inorganic-N loss from soil cores and remaining in soils after the three  
3 simulated heavy rain events. The error bars indicate standard deviations ( $n=3$ ). The small letters  
4 on each bar indicate significant difference within each aggregate size.

5

6

7

8 Fig. S1.

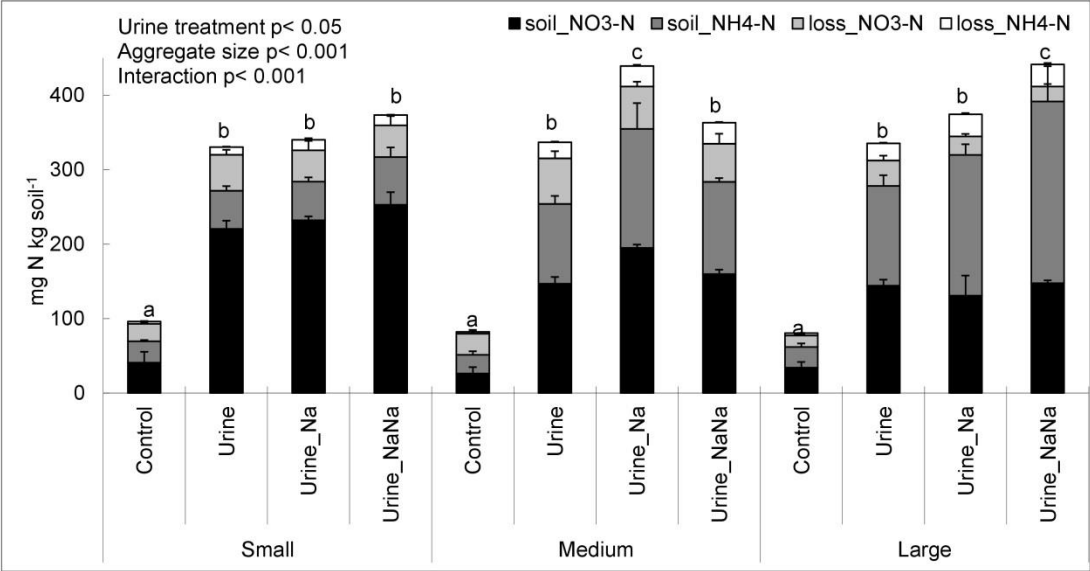

Supplement: f1 [file 275985.f1.pdf]
